# Supplementary material for: Differential expression and tumorigenic function of neurotensin receptor 1 in neuroendocrine tumor cells
Source: PubMed Central journal article supplement (PMC4694966; doi:10.18632/oncotarget.4745), 2015-07-27
Supplement: oncotarget-06-26960-s001.pdf [file oncotarget-06-26960-s001.pdf]

## SUPPLEMENTARY FIGURES AND TABLE

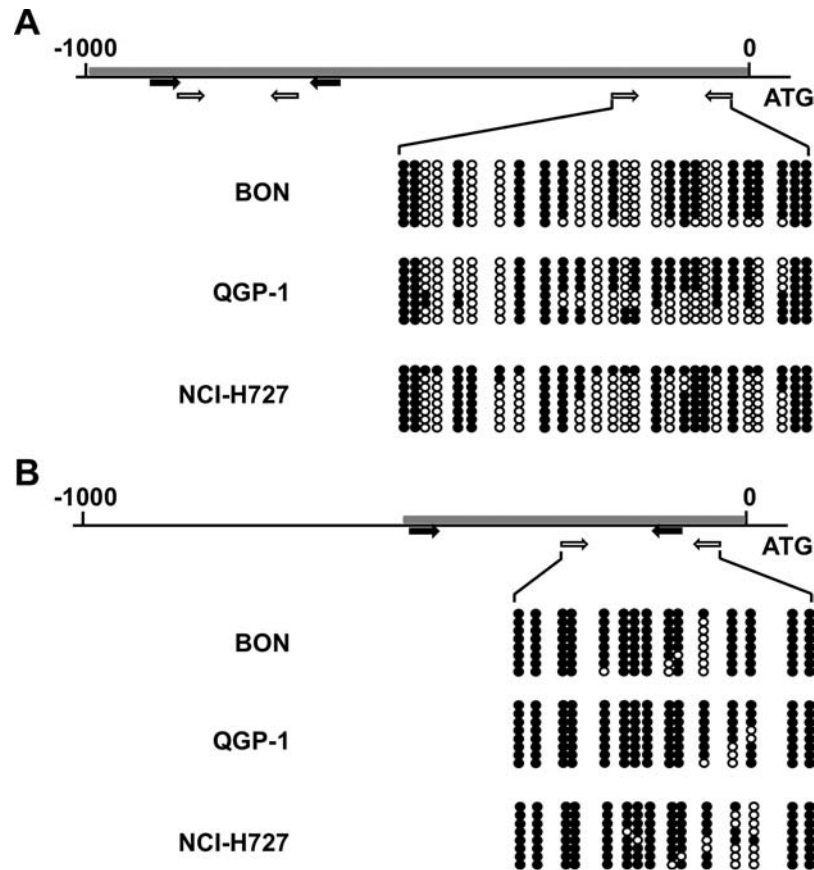

**Supplementary Figure S1: Sequencing analysis of the *NTSR1* and *NTSR2* MSP products of NET cells. A.** Sequencing analysis of *NTSR1* promoters by MSP using NTSR1B primer set in BON, QGP-1 and NCI-H727 cells. Each row of circles represents the DNA sequence of an individual clone; closed and open circles indicate methylated and unmethylated CpG sites, respectively. Bold gray lines are candidate CpG island regions searched by Methyl Primer Express Software v1.0 (Applied Biosystems). The open, and closed arrows below the CpG islands represent the primers for MSP and bisulfite sequencing, respectively. **B.** MSP sequencing analysis of the *NTSR2* CpG islands in the NET cells as described above.

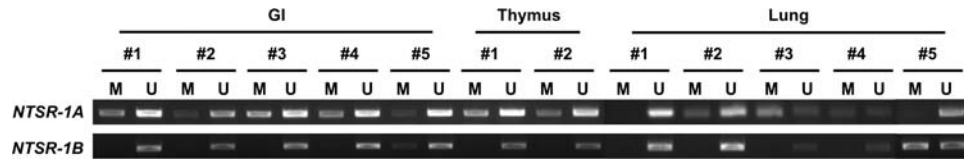

**Supplementary Figure S2: MSP analysis of the *NTSR1* gene promoter region in normal tissues.** The PCR products using respective two *NTSR1* primer pairs (*NTSR1A* and *NTSR1B*) specific for the methylated (M) and unmethylated (U) DNA were visualized by 2% agarose gel. The normal tissues including GI, thymus and lung tissues for genomic DNA were provided from Markey Biospecimen and Tissue Procurement Shared Resource Facility, University of Kentucky.

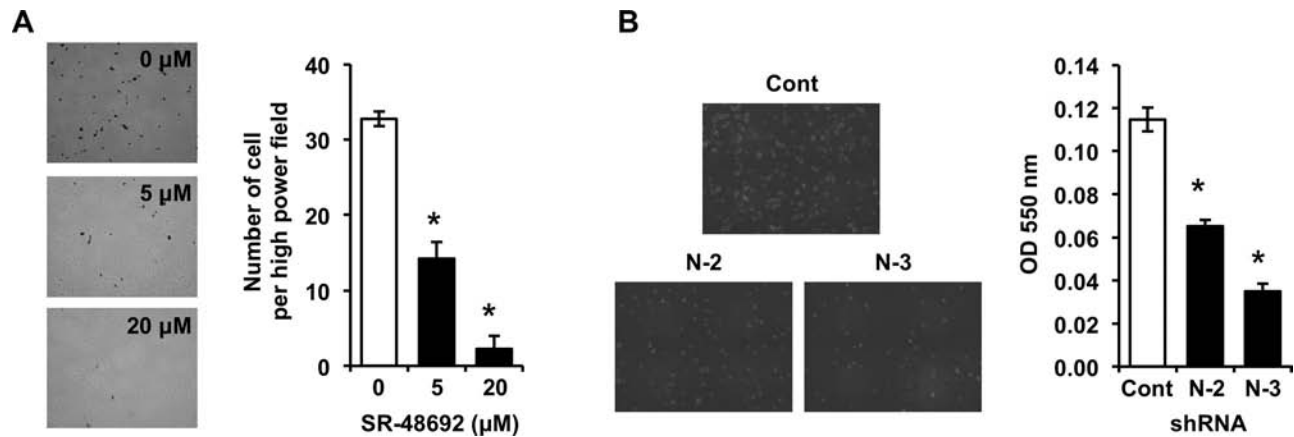

**Supplementary Figure S3: Effects of pharmacologic inhibition and stable silencing for NTSR1 on NET cell migration and attachment, respectively.** **A.** Transwell migration assays were performed using BON cells treated with different concentrations of SR-48692, an NTSR1 antagonist over 24 h. Microscopic examination of the migrated BON cells (left); the number of migrated cells was counted in four different fields with an inverted microscope (right; \* $p < 0.05$  vs. DMSO). **B.** Microscopic examination of the attached BON cell clones (N-2 and N-3) in 48 well plates coated with collagen I for 15 min (left). The absorbance for crystal violet-stained cells was measured at 550 nm (right; \* $p < 0.05$  vs. control shRNA).

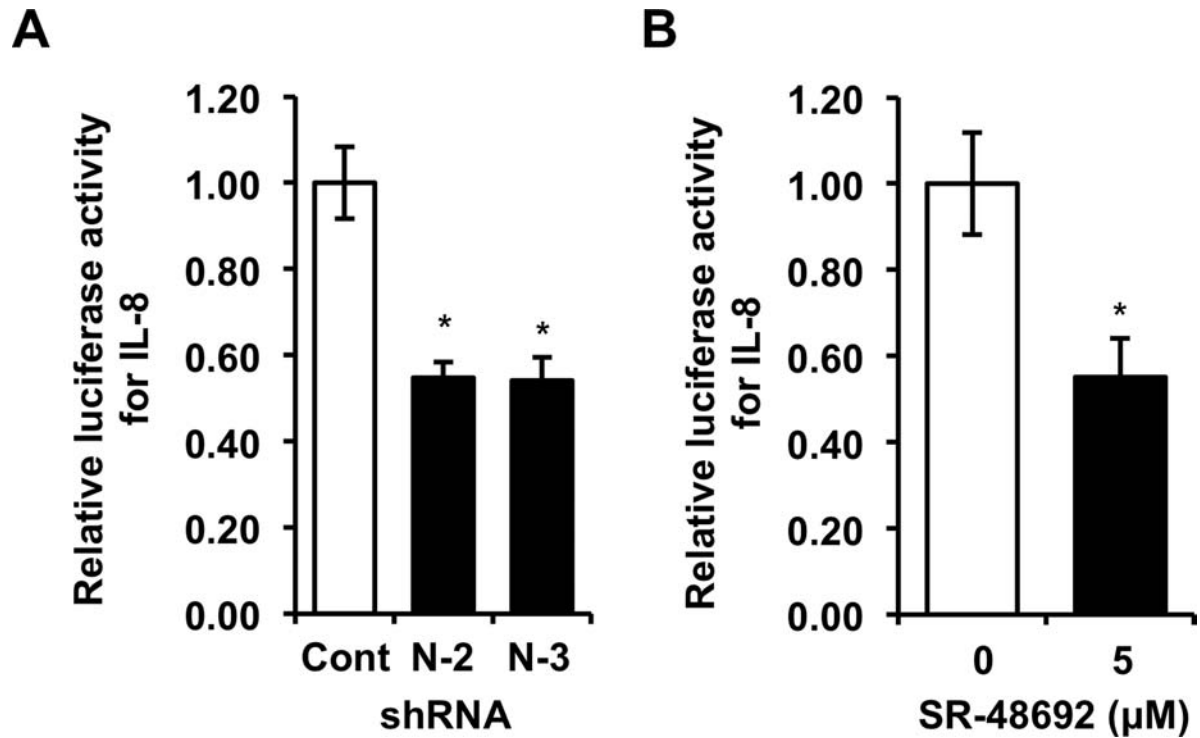

**Supplementary Figure S4: Effects of stable knockdown or pharmacologic blockade of NTSR1 on IL-8 promoter activities in BON cells.** A. Relative luciferase activity of an IL-8 promoter reporter in NTSR1 knockdown BON cell clones. BON cell clones were plated in 24-well plates and transiently transfected with an IL-8 promoter reporter and a Renilla luciferase reporter. Luciferase activity was measured 2 d after transfection ( $*p < 0.05$  vs. control shRNA). B. Relative IL-8 promoter activity of BON cells treated with 0 (DMSO) or 5  $\mu$ M SR-48692 ( $*p < 0.05$  vs. DMSO).

**Supplementary Table S1. Primer sequences for PCR reaction (F, Forward; R, Reverse; MSP, Methylation-Specific PCR; M, Methylated DNA; U, Unmethylated DNA; BS, Bisulfite-Sequencing)**

| Target         | Experiment | Primer Name      | Primer sequences          |
|----------------|------------|------------------|---------------------------|
| NTSR1          | RT-PCR     | NTSR1 F          | TCATCGCCTTTGTGGTCTGCT     |
|                |            | NTSR1 R          | TGGTTGCTGGACACGCTGTCC     |
| NTSR2          | RT-PCR     | NTSR2 F          | GTCTCCTCAGCTTCATCGTAT     |
|                |            | NTSR2 R          | TCCCCAAAGCCTGAAAGCTGTA    |
| NTSR3          | RT-PCR     | NTSR3 F          | AGAATGGTCGAGACTATGTTG     |
|                |            | NTSR3 R          | AAGAGCTATTCCAAGAGGTCC     |
| NTS            | RT-PCR     | NTS F            | GATGATGGCAGGAATGAAAATCCAG |
|                |            | NTS R            | GTTGAAAAGCCCTGCTGTGACAGA  |
| $\beta$ -actin | RT-PCR     | $\beta$ -actin F | TCACCAACTGGGACGACATG      |
|                |            | $\beta$ -actin R | ACCGGAGTCCATCACGATG       |
| NTSR1          | MSP M      | MSP NTSR1A M F   | GGTCGGTTTAATTAGTTGC       |
|                |            | MSP NTSR1A M R   | CGAATATCGTACACCAAAC       |
| NTSR1          | MSP U      | MSP NTSR1A U F   | GGGGTTGGTTTAATTAGTTGT     |
|                |            | MSP NTSR1A U R   | ACAAATATCATAACCAAACC      |
| NTSR1          | MSP M      | MSP NTSR1B M F   | TTGGAATTCGTGGTAAGC        |
|                |            | MSP NTSR1B M R   | GTCTCAAACGAAAACCGATA      |
| NTSR1          | MSP U      | MSP NTSR1B U F   | TATTTGGAATTTGTGGTAAGT     |
|                |            | MSP NTSR1B U R   | ATCTCAAACAAAACCAATAAAC    |
| NTSR2          | MSP M      | MSP NTSR2 M F    | GTGGAGTTCGGTTTAATTC       |
|                |            | MSP NTSR2 M R    | ACTACCCGAAATCTAAACG       |
| NTSR2          | MSP U      | MSP NTSR2 U F    | GGTGGAGTTTGGTTTAATTT      |
|                |            | MSP NTSR2 U R    | CACTACCCAAAATCTAAACA      |
| NTSR1          | BS         | BS NTSR1 F       | TTGTGGATATTTAGGAGTGGG     |
|                |            | BS NTSR1 R       | CTCCAAAAAACCAAAATTCC      |
| NTSR2          | BS         | BS NTSR2 F       | TGTTGGGAAAGTTTTTTTAAAG    |
|                |            | BS NTSR2 R       | AAACACCTCCTCTCTCTAAAAA    |
| c-Myc          | RT-PCR     | c-Myc F          | TGAAAGGCTCTCCTTGCAGC      |
|                |            | c-Myc R          | GCTGGTAGAAGTTCTCCTCC      |
| CyclinD1       | RT-PCR     | CyclinD1 F       | ATGTGTGCAGAAGGAGGTCC      |
|                |            | CyclinD1 R       | CTTAGAGGCCACGAACATGC      |
| IL-8           | RT-PCR     | IL-8 F           | CATGACTTCCAAGCTGGCCG      |
|                |            | IL-8 R           | AATTTTTTATGAATTCTCAGCCCTC |
| Alu            | PCR        | Alu F            | ACGCCTGTAATCCCAGCACTT     |
|                |            | Alu R            | TCGCCCAGGCTGGAGTGCA       |
